# Supplementary material for: Integrated multi-omics analysis of Alzheimer’s disease shows molecular signatures associated with disease progression and potential therapeutic targets
Source: Springer Nature journal article supplement (doi:10.1038/s41598-023-30892-6), 2023-03-06
Supplement: MOESM12 [file 41598_2023_30892_MOESM12_ESM.pdf]

# **Integrated multi-omics analysis of Alzheimer's disease shows molecular signature associated with disease progression and potential therapeutic targets**

Pradeep Kodam<sup>1</sup>, Sai Swaroop. R<sup>2</sup>, Sai Sanwid Pradhan<sup>2</sup>, Venketesh Sivaramakrishnan<sup>2\*</sup>, Ramakrishna Vadrevu<sup>1\*</sup>

<sup>1</sup>Department of Biological Sciences, Birla Institute of Technology and Science Pilani, Hyderabad Campus, Jawahar Nagar, Hyderabad, 500078 Telangana, India

<sup>2</sup>Disease Biology Lab, Department of Biosciences, Sri Sathya Sai Institute of Higher Learning, Prasanthi Nilayam, Anantapur, 515134 Andhra Pradesh, India

\*Corresponding author

\* [Venketesh Sivaramakrishnan: s.venketesh@gmail.com](mailto:s.venketesh@gmail.com)

\* [Ramakrishna Vadrevu: vrk@hyderabad.bits-pilani.ac.in](mailto:vrk@hyderabad.bits-pilani.ac.in)

Keywords: Alzheimer's disease, Integrated multi-omics, Vitamin-cofactor analysis, mice model, neurodegenerative disease.

**Supplementary-12 : Detailed information of all the datasets analysed in the present study.**

## Human - Transcriptomics

| Dataset   | Total number of samples | AD samples | Control samples | Sex<br>AD(Alzheimer's disease)<br>CTRL(Control) |                                  | Age<br>AD(Alzheimer's disease)<br>CTRL(Control) |                                 |                            |                              | Tissues                                                                                                                       |
|-----------|-------------------------|------------|-----------------|-------------------------------------------------|----------------------------------|-------------------------------------------------|---------------------------------|----------------------------|------------------------------|-------------------------------------------------------------------------------------------------------------------------------|
| GSE5281   | 161                     | 68         | 93              | Male :<br>50 (AD), 53 (CTRL)                    | Female :<br>37 (AD), 21 (CTRL)   | Female AD :<br>70 - 95 years                    | Female CTRL :<br>73 - 102 years | Male AD :<br>68 - 97 years | Male CTRL:<br>63 - 85 years  | Entorhinal cortex, hippocampus, medial temporal gyrus, posterior cingulate, superior frontal gyrus and primary visual cortex. |
| GSE36980  | 80                      | 33         | 47              | Male :<br>15 (AD), 22 (CTRL)                    | Female :<br>18 (AD), 25 (CTRL)   | Female AD :<br>84 – 105 years                   | Female CTRL :<br>54 – 100 years | Male AD :<br>83 – 99 years | Male CTRL:<br>55 – 89 years  | Frontal cortex, Temporal cortex, Hippocampus                                                                                  |
| GSE44770  | 230                     | 129        | 101             | Male :<br>62 (AD), 82 (CTRL)                    | Female :<br>67 (AD), 19 (CTRL)   | Female AD :<br>60 - 100 years                   | Female CTRL :<br>53 - 95 years  | Male AD :<br>55 - 98 years | Male CTRL:<br>22 - 106 years | Pre-frontal cortex                                                                                                            |
| GSE48350  | 253                     | 204        | 249             | Male :<br>33 (AD), 91 (CTRL)                    | Female :<br>47 (AD), 82 (CTRL)   | Female AD :<br>61 -88 years                     | Female CTRL :<br>62 – 89 years  | Male AD :<br>61 – 87 years | Male CTRL:<br>61 – 86 years  | Hippocampus, Entorhinal cortex, Superior frontal cortex, Post-central gyrus                                                   |
| GSE140829 | 587                     | 80         | 173             | Male :<br>100 (AD), 110 (CTRL)                  | Female :<br>104 (AD), 139 (CTRL) | Female AD :<br>60 – 95 years                    | Female CTRL :<br>26 – 99 years  | Male AD :<br>76 – 94 years | Male CTRL:<br>20 – 97 years  | Whole blood                                                                                                                   |

## Human - Proteomics

| Tissue | Dataset                                                                                                                      | Total number of samples |                   | AD samples          | Control samples   |
|--------|------------------------------------------------------------------------------------------------------------------------------|-------------------------|-------------------|---------------------|-------------------|
| Blood  | Proteomics Analysis of Blood Serums from Alzheimer's Disease Patients Using iTRAQ Labeling Technology                        | 60                      | Number of samples | 30                  | 30                |
|        |                                                                                                                              |                         | Gender            | male : female (3:2) |                   |
|        |                                                                                                                              |                         | Age               | 65 - 85 years       |                   |
| Brain  | Deep Multilayer Brain Proteomics Identifies Molecular Networks in Alzheimer's Disease Progression                            | 90                      | Number of samples | 36                  | 54                |
|        |                                                                                                                              |                         | Gender            | 16 male 20 female   | 30 male 24 female |
|        |                                                                                                                              |                         | Age               | 60 - 99 years       | 69 – 98 y         |
| CSF    | Integrated proteomics reveals brain-based cerebrospinal fluid biomarkers in asymptomatic and symptomatic Alzheimer's disease | 40                      | Number of samples | 20                  | 20                |
|        |                                                                                                                              |                         | Gender            | 12 male 8 female    | 11 male 9 female  |
|        |                                                                                                                              |                         | Age               | 65.6 ± 11.6 years   | 69.2 ± 9.0 years  |

## Human - Metabolomics

| Tissue | Dataset                                                                                                                                          | Total number of samples |                   | AD samples        | Control samples   |
|--------|--------------------------------------------------------------------------------------------------------------------------------------------------|-------------------------|-------------------|-------------------|-------------------|
| Blood  | Metabolite profiling for the identification of altered metabolic pathways in Alzheimer's disease                                                 | 44                      | Number of samples | 23                | 21                |
|        |                                                                                                                                                  |                         | Gender            | 8 male 15 female  | 9 male 12 female  |
|        |                                                                                                                                                  |                         | Age               | 79.52 ± 5.9 years | 72.1 ± 5.4 years  |
| Brain  | Unbiased metabolomic investigation of alzheimers disease brain points to dysregulation of mitochondrial aspartate metabolism                     | 40                      | Number of samples | 21                | 19                |
|        |                                                                                                                                                  |                         | Gender            | 9 male 12 female  | 12 male 7 female  |
|        |                                                                                                                                                  |                         | Age               | 82.4 ± 6.7 years  | 83.4 ± 6.4 years  |
| CSF    | Comparative analysis of cerebrospinal fluid metabolites in Alzheimer's disease and idiopathic normal pressure hydrocephalus in a Japanese cohort | 58                      | Number of samples | 39                | 19                |
|        |                                                                                                                                                  |                         | Gender            | 14 male 25 female | 9 male, 10 female |
|        |                                                                                                                                                  |                         | Age               | 47 - 86           | 70 - 86           |

Mice - Proteomics

| Tissue | Dataset                                                                                                                                                                                                           | Total number of samples |                   | AD samples                                                                                                                     | Control samples              |
|--------|-------------------------------------------------------------------------------------------------------------------------------------------------------------------------------------------------------------------|-------------------------|-------------------|--------------------------------------------------------------------------------------------------------------------------------|------------------------------|
| Blood  | Proteomic Analysis of Serum Proteins in Triple Transgenic Alzheimer’s Disease Mice: Implications for Identifying Biomarkers for Use to Screen Potential Candidate Therapeutic Drugs for Early Alzheimer’s Disease | 12                      | Number of samples | 12                                                                                                                             | 4                            |
|        |                                                                                                                                                                                                                   |                         | Gender            | 12 male                                                                                                                        | 4 male                       |
|        |                                                                                                                                                                                                                   |                         | Age               | 5 months                                                                                                                       | 5 months                     |
|        |                                                                                                                                                                                                                   |                         | Strain            | 3xTg-AD mice expressing the human mutations APPSwe, PS1M146V, and TauP301L (strain: B6; 129-Psen1tm1Mpm Tg [APPSwe, tauP301L]) | WT mice (strain: B6129SF2/J) |
| Brain  | iTRAQ Analysis of Complex Proteome Alterations in 3xTgAD Alzheimer’s Mice: Understanding the Interface between Physiology and Disease                                                                             | 16                      | Number of samples | 8                                                                                                                              | 8                            |
|        |                                                                                                                                                                                                                   |                         | Gender            | 8 male                                                                                                                         | 8 female                     |
|        |                                                                                                                                                                                                                   |                         | Age               | 16 month                                                                                                                       | 16 month                     |
|        |                                                                                                                                                                                                                   |                         | Strain            | 3xTgAD mice                                                                                                                    | C57/BL6 control              |

Mice - Metabolomics

| Tissue | Dataset                                                                                                                                        | Total number of samples |                   | AD samples                                                                                                                                                                                                                                                             | Control samples                                                               |
|--------|------------------------------------------------------------------------------------------------------------------------------------------------|-------------------------|-------------------|------------------------------------------------------------------------------------------------------------------------------------------------------------------------------------------------------------------------------------------------------------------------|-------------------------------------------------------------------------------|
| Blood  | Alzheimer’s disease like pathology has transient effects on the brain and blood metabolome                                                     | 82                      | Number of samples | 41                                                                                                                                                                                                                                                                     | 41                                                                            |
|        |                                                                                                                                                |                         | Age               | 6months (9 samples).8,10,12,18 months (8 samples each respectively)                                                                                                                                                                                                    | 6months (9 samples).8,10,12,18 months (8 samples each respectively)           |
|        |                                                                                                                                                |                         | Strain            | APP/PS1 mice are a transgenic C57BL/6J and coexpressing the Swedish mutation (K595N/M596L) and the deltaE9 PS1 exon deletion                                                                                                                                           | Mice not expressing the transgene were used as WT controls.                   |
| Brain  | Metabolomic screening of regional brain alterations in the APP/PS1transgenic model of Alzheimer’s disease by direct infusion mass spectrometry | 60                      | Number of samples | 30                                                                                                                                                                                                                                                                     | 30                                                                            |
|        |                                                                                                                                                |                         | Gender            | 13 male 17 female                                                                                                                                                                                                                                                      | 15 male 15 female                                                             |
|        |                                                                                                                                                |                         | Age               | 6 months                                                                                                                                                                                                                                                               | 6 months                                                                      |
|        |                                                                                                                                                |                         | Strain            | Transgenic APP/PS1 mice (C57BL/6 background) were generated by expressing the Swedish mutation of APP together with PS1 deleted in exon9                                                                                                                               | age-matched wild-type mice of the same genetic background (C57BL/6)           |
| CSF    | Defects in Mitochondrial Dynamics and Metabolomic Signatures of Evolving Energetic Stress in Mouse Models of Familial Alzheimer’s Disease      | 12                      | Number of samples | 9                                                                                                                                                                                                                                                                      | 3                                                                             |
|        |                                                                                                                                                |                         | Gender            | 2 male 7 female                                                                                                                                                                                                                                                        | 1 male 2 female                                                               |
|        |                                                                                                                                                |                         | Age               | 16 and 36 months                                                                                                                                                                                                                                                       | 16 and 36 months                                                              |
|        |                                                                                                                                                |                         | Strain            | Transgenic mice (C57B6) that expressed mutant human APP695 containing a double mutation (K670N, M671L). PS1 mice :mutant human PS1 containing a single mutation (M146L). APP/PS1, were produced in house by crossbreeding of homozygous PS1 and heterozygous APP mice. | Littermates that did not carry transgenes were used as non transgenic control |
